# Supplementary material for: Genome-Wide Analysis of In Vivo Binding of the Master Regulator DasR in Streptomyces coelicolor Identifies Novel Non-Canonical Targets
Source: PLOS journal article supplement (doi:10.1371/journal.pone.0122479), 2015-04-15

**S5 Fig. Chip-on-chip data for selected targets for which DasR binding was induced in response to GlcNAc addition.** Samples were collected prior to ( $T_0$ , closed circles) and 30 ( $T_1$ , closed squares), 60 ( $T_2$ , closed triangle) or 120 min ( $T_3$ , closed inverted triangle) after addition of GlcNAc. Enhanced binding of DasR to the upstream regions of: *cydA* for cytochrome oxidase subunit I; the cell division-related gene SCO2078; *dnaZ* for DNA polymerase II subunit gamma; and the gene for ncRNA scr3092./

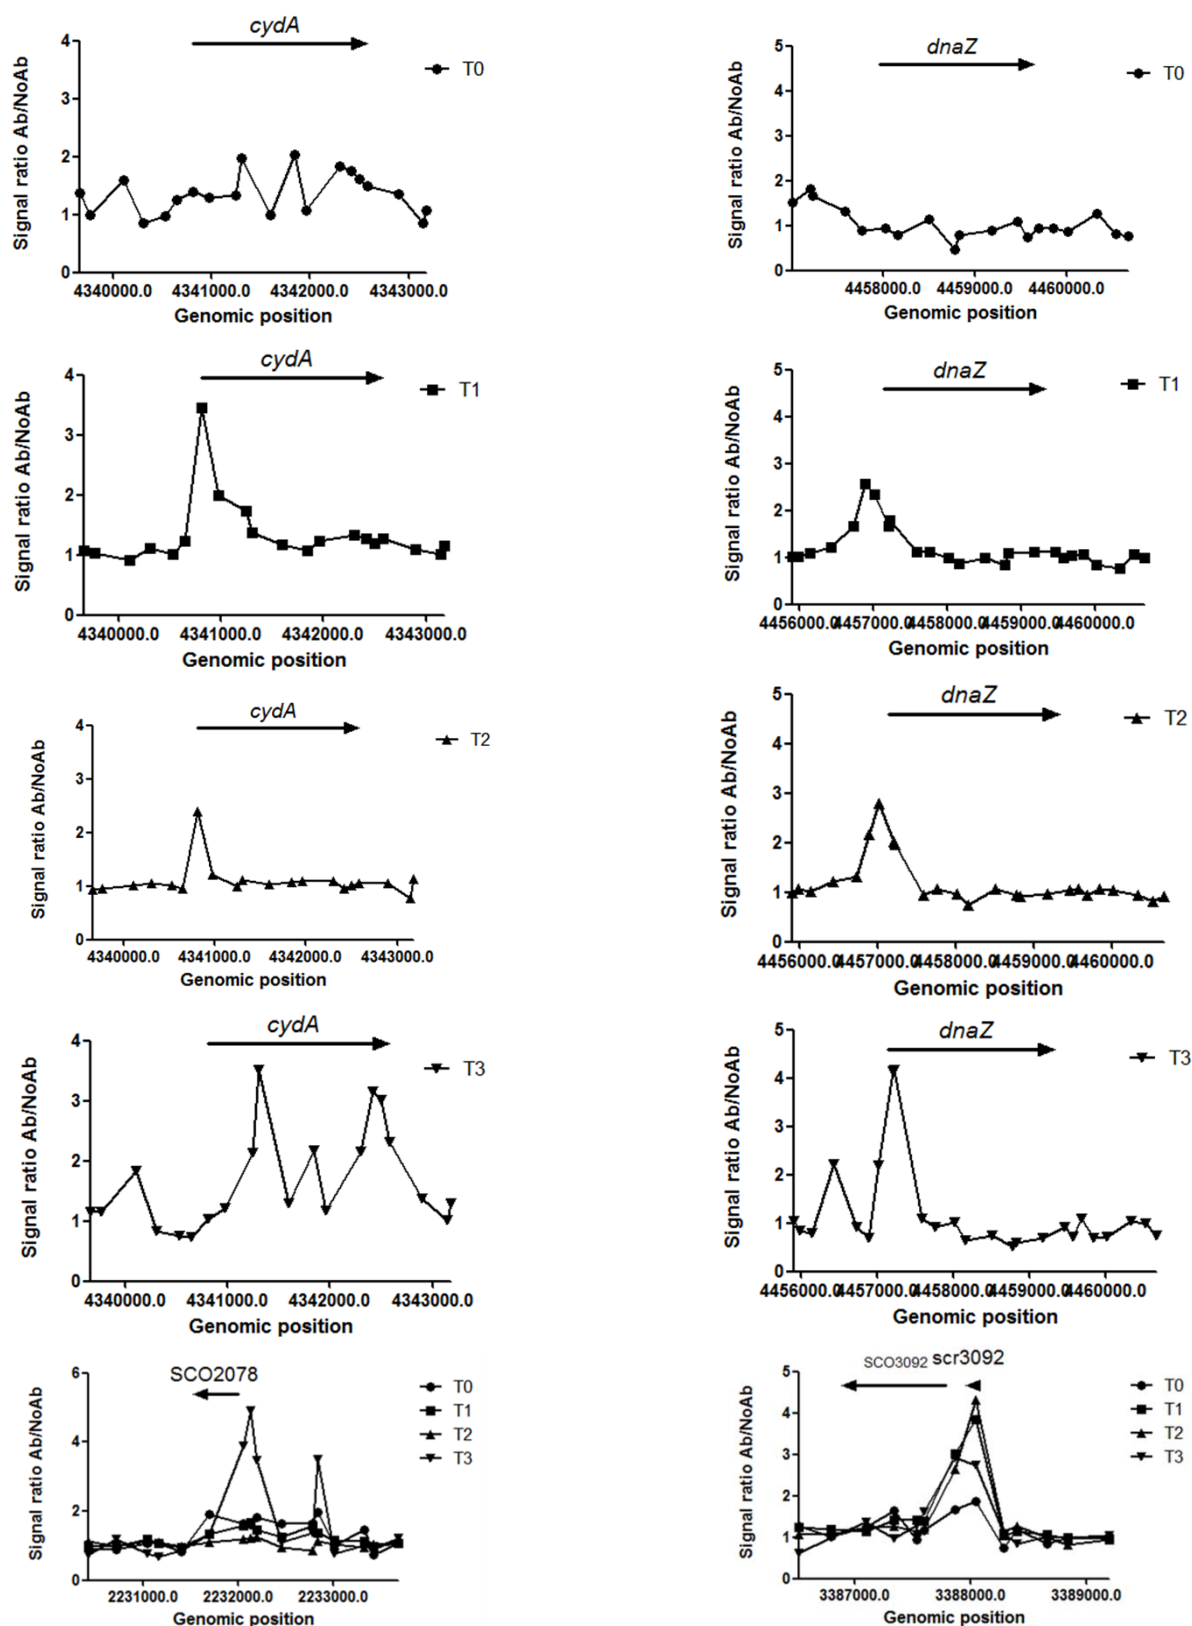

Supplement: S5 (10.1371/journal.pone.0122479.s005) [file journal.pone.0122479.s005]
